# Supplementary material
Source: PubMed Central journal article supplement (PMC9893229)
Supplement: NIHMS1866192-supplement-SM.pdf [file NIHMS1866192-supplement-SM.pdf]

# PEGylated cationic polylactides for hybrid bio-synthetic gene delivery

Charles H. Jones,<sup>a,‡</sup> Chih-Kaung Chen,<sup>b,‡</sup> Mingfu Chen,<sup>a</sup> Anitha Ravikrishnan,<sup>a</sup> Hanguang Zhang,<sup>a</sup> Akhila Gollakota,<sup>a</sup> Taichun Chung,<sup>a</sup> Chong Cheng,<sup>a,\*</sup> and Blaine A. Pfeifer<sup>a,\*</sup>

**Supplementary Information**

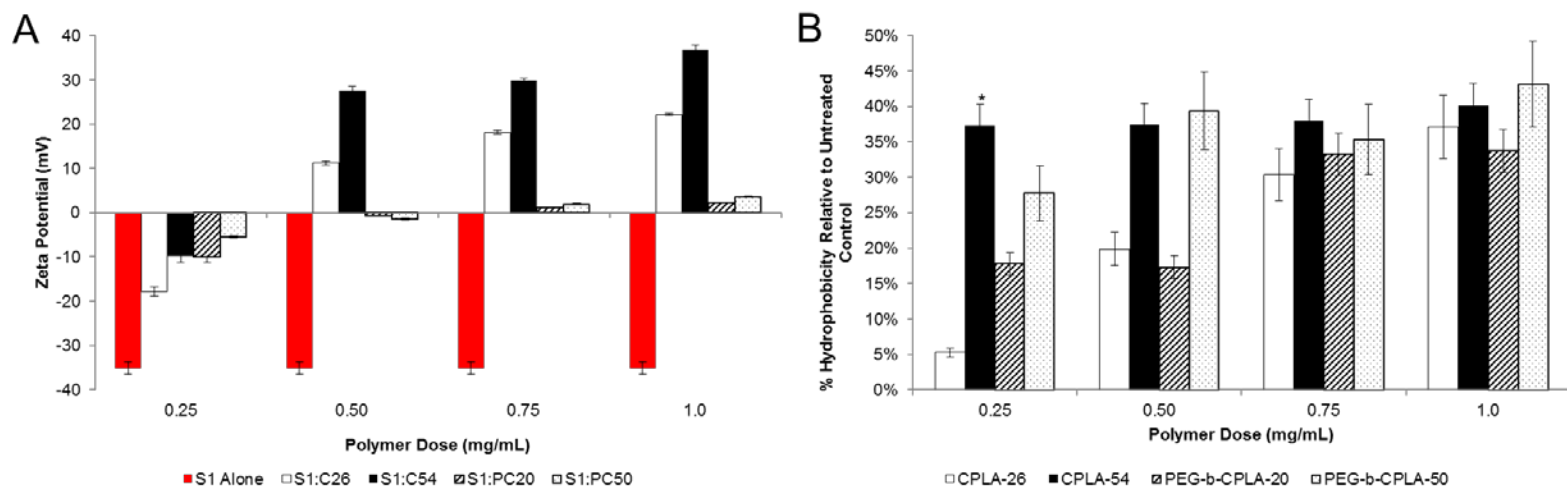

**Figure S1.** Physical characterization of hybrid vectors. (A) Zeta potential and (B) MATH assay at various polymer dosages. \*Indicates statistical significance of CPLA-54 hydrophobicity relative to all other polymers.

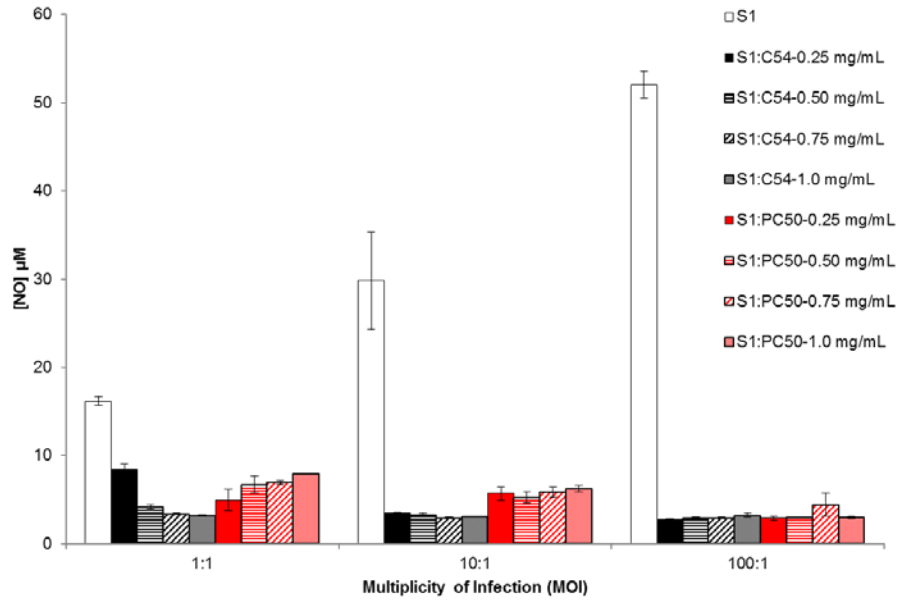

**Figure S2.** NO production of RAW264.7 after incubation with of CPLA-54 and PEG-*b*-CPLA-50 hybrid vectors.

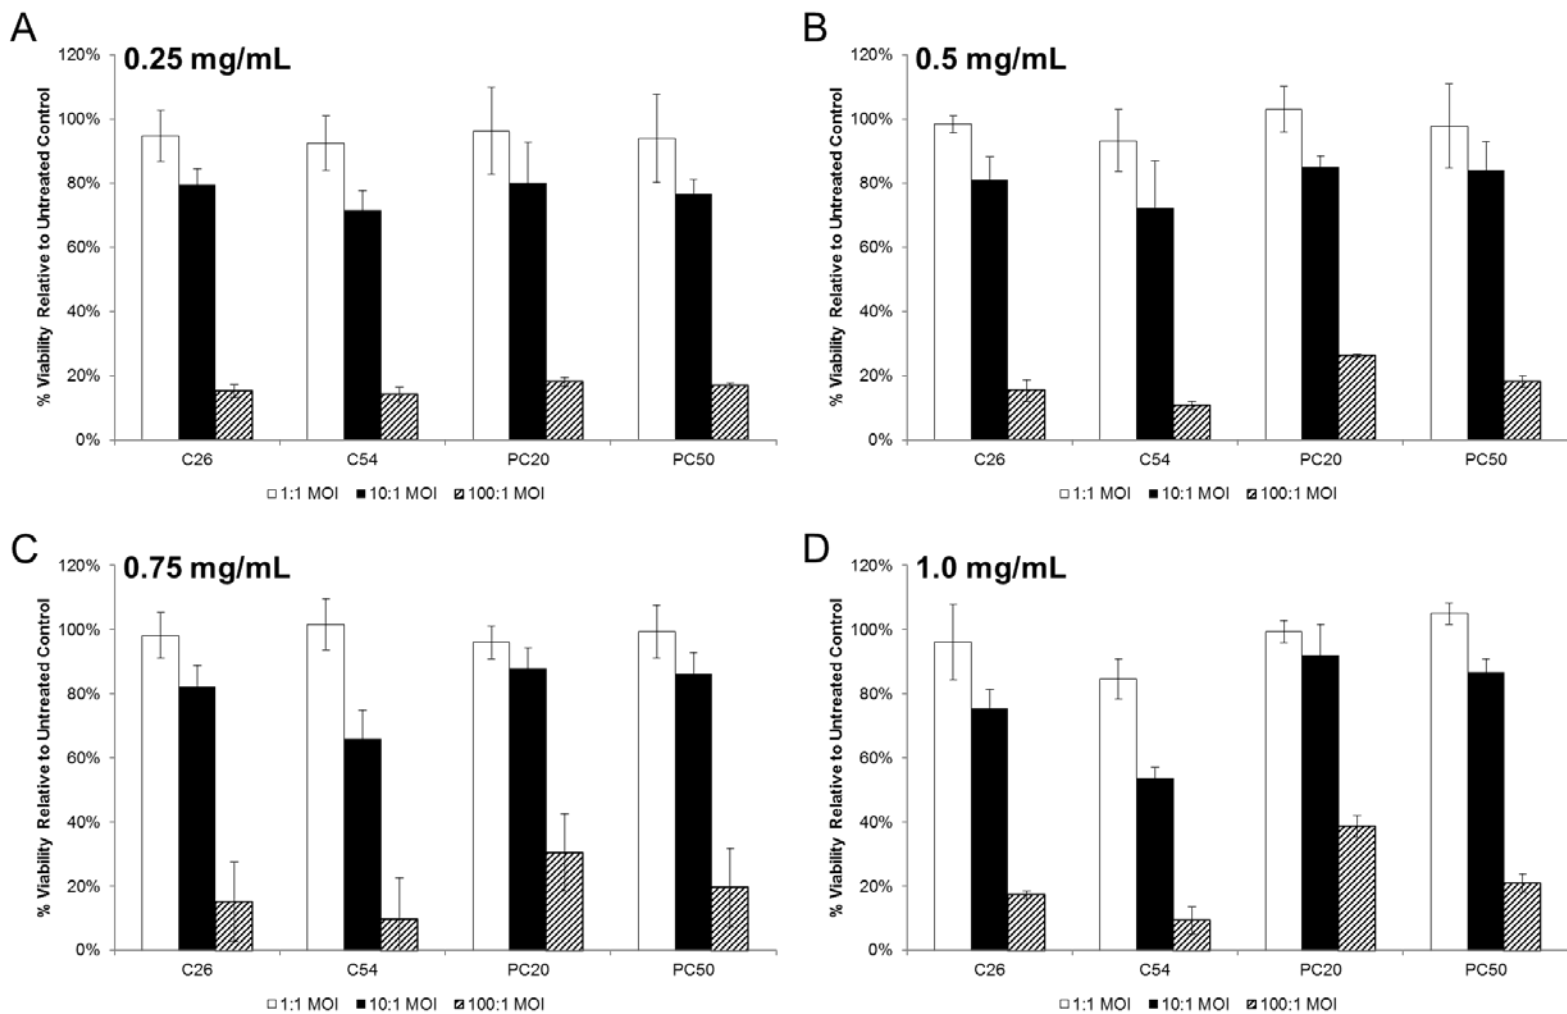

**Figure S3.** Different presentation of data in Figure 4. APC viability data is present by different polymer doses.
